# Supplementary material for: Multiple Wnt/ß-Catenin Responsive Enhancers Align with the MYC Promoter through Long-Range Chromatin Loops
Source: PLoS One. 2011 Apr 20;6(4):e18966. doi: 10.1371/journal.pone.0018966 (PMC3080403; doi:10.1371/journal.pone.0018966)
Supplement: Table S1 — PCR primer sequences, chromosomal positions of ß-catenin ChIP-Seq peaks and the positions of consensus TCF4 motifs within the ß-catenin bound peak regions. (XLSX) [file pone.0018966.s002.xlsx]

## Sheet: Primer sequences
Real-time PCR primer sets for chromatin immunoprecipitation analysis
A	MYC A L	AAATCAAGGGCAGGGACCACAG
	MYC A R	CAGAATGGCAGAGTGAGGGGACAT
B	MYC B L	CAGGGCTTATTGTTGGGACAGAGTAGT
	MYC B R	CGAAAACGCTCACGATTCACAGA
C	MYC C L	AGGGTGGACAAGCACAAGCATTA
	MYC C R	ATTGGGACCTTTGGAGGCAAGAAT
D	MYC D L	CTTCTGCTCCCTTCTCTTCTCTCAGT
	MYC D R	ACCACCACACTCCATCTTTCCAAC
E	MYC E L	GAGGGCGATAAAAGGGACAAGGA
	MYC E R	GATGTTTGCTGGAACGCTGCTC
F	MYC F L	TGCCTGGGCCTTGCTACTACTACAG
	MYC F R	CTGGCATTCTTCTCCCACCGTAAG
Negative ctrl 1	L	TGAGAGGTGGAGAAAGAGATGTTCA
	R	CCCCAGAGACACAAAAGGGAAGA
Negative ctrl 2	L	AACGGCTGCTTTTCTGTTCTCC
	R	ATGTGGATGCTGCTTGTCTGGAA
Myc promoter	L	AGGCAACCTCCCTCTCGCCCTA
(also Myc 5' enhancer)	R	AGCAGCAGATACCGCCCCTCCT
Myc 3' enhancer	L	GCTCAGTCTTTGCCCCTTTGTGG
	R	TAACACCTTCCCGATTCCCAAGTG
Primers to measure transcript expression by reverse transcription qPCR
MYC	L	GCAAACCTCCTCACAGCCCACT
	R	AACTTGACCCTCTTGGCAGCA
Tubulin	L	TGGCACTGGCTCTGGGTTCG
	R	GGGGCTGGGTAAATGGCAAA
Real-time PCR primer sets for quantitative chromatin conformation capture
PCR primers used to produce amplicons across the HindIII sites adjacent to
enhancers A, B, C, D, E or the MYC promoter (Pr)
Myc A loop 1	GCTTGGGTGAGGGAGTGAT
Myc A loop 2	TCTGTGGTTTTGATTGGAGAAA
Myc B loop 1	CCTCCTTCCCATCTTGGTG
Myc B loop 2	TTCCCAGTCTTTTCATCTGCT
Myc C loop 1	GGCATTTTTCTGAGGTGTTGA
Myc C loop 2	CCATTTGAGGGTGGAAGAGC
Myc D loop 1	CACCAAGTCCCAGAACAGGT
Myc D loop 2	GCACAGACGAGGAGCAGTC
Myc E loop 1	AAACCCACAGAGCAGACACC
Myc E loop 2	TCAGAGGAAAAACACAGACACC
Myc Pr 1	TCCCCTTTCCCCAATAAATC
Myc Pr 2	AAGTTTCCAGCCACCTCCTT
3C DNA product detection pairs
		Left primer	Right primer
A with Promoter region		Myc A loop 1	Myc Pr 2
B with Promoter region		Myc B loop 1	Myc Pr 2
C with Promoter region		Myc C loop 1	Myc Pr 2
D with Promoter region		Myc D loop 1	Myc Pr 2
E with Promoter region		Myc E loop 1	Myc Pr 2
Tubulin control primer sets
Tub 3C L	TGTGAGAGAAACCCAGACCA
Tub 3C R	ATGCCCAGTGACAAGACCAT
Tub 3C1 L	ATCTCATCTGGAAGGGCAAAAACC
Tub 3C1 R	GTGAAACTGGTGCTGGAAAACACG

## Sheet: ChIP-Seq peaks
Supplemental table S1:
Peak regions identified in the b-catenin ChIP-Seq library conducted in HCT116 cells
			Peak density	Distance to
	Peak	Boundary	(ChIP-Seq reads)	MYC TSS
	A	chr8:128296391-128297210	35	-520288
	B	chr8:128300071-128300830	30	-516668
	C	chr8:128303931-128304850	70	-512648
	D	chr8:128328631-128329290	22	-488208
	E	chr8:128347011-128347610	21	-469888
	F	chr8:128411474-128412200	33	-405298
	rs6983267	chr8:128482111-128482810	19	-334688
	5' WRE	chr8:128816361-128817093	57	-405
	3' WRE	chr8:128824211-128824990	226	7492

## Sheet: TCF4 motifs
TCF4 consensus sequences within MYC distal enhancers A-E
consensus motif: A/T-A/T-C-A-A-A-G
extended motif: A/T/G-C/G-A/T-A/T-C-A-A-A-G
Enhancer A:
chr8:128296391-128297210
TGCCTTTTATTCCATGTTCACAATTCATCTTATTTTCATTTAAGACAACC
AACTGGGCTAGTTAGAGCCGAGATTTGAGCCCAGTTTTTCTCACTGACTC
TAAAACCTATCCATGCTCCTAAACCTCCTCACCATTGGAGGGCATTGCTG
TTTACCCTTTCAGTTTCAGCTGTACTATCAAAAGCAGCAAATCAAGGGCA
GGGACCACAGCTTGACCTTAAACTATTCAACTGCACTTAATTACCCATTG
TAGTGGAAGCACATAAATACAGGATGTCCCCTCACTCTGCCATTCTGCTT
TGCATCATTATCAAAAAGACAAAGGTAATTCATGTCTAATTACTCACTCA
CCGCAAGGTCAGAATATTTATTTTTATCATACTTGTGATTTTTAGGATTA
GTGATATCAGTATTTATTCATGGCTAACCTAAATCAAACATCCTGTTGAT
ATCTGTAAAGAGCCATATAGTTATTGTCGCAGGTATGCTGAGTCACAAAG
CAAATACAAAGTTTATGAGTTGACAGGGAAAAGGCTGCAGAGAGGTAGAG
ATAAGTGTGCCTGGGTAATCACAAGTGTCTTGTGAAATATACACATTGTT
TATTTATATTGTCCATTTATCAAGCTCAATGGGGGCTTGGGAAACTGAAA
ATAATCAAAATAGGAAAAATTATTGGTATTATTTTCTAAATTTGCTGCTG
GTGCTGACTTTTTGGTTCAATTTATTAAATACTTACTTTAGAAATTATTC
TCTGTTTTTAGTGGAATAGAGCTTTGACCAGCTTGAGAAAGACAAAAGGA
GAAGTAGAAGAGAAGGGGAA
Enhancer B:
chr8:128300071-128300830
TACTGATTTTATATATGTGTGTGTGTATATATATATATACACACACACAC
ACACACACATATATATACACACACATATATATATATGTTGTGCCTAGCAA
GTGTATGACACAAAATACCCATAAATTGAATGAATGAATGAATTAATAAA
GAAATGAATAACTTACCCAACCTGGTAAGTGGCAGGGCTGGCCAGGTCAG
TGCAACTTCAAAGTCGATGTTGTCAGTGAATGCTCCAGATGGATTGCAGA
GAAGACCAAAGTTCATGTCTCGGCACCTTTCCCAATGTACAGGGCTTATT
GTTGGGACAGAGTAGTGCCTGGCCTAGAAGTTAAACATTCATCCAGCTAG
CTATTAAGGCTTGAATGCCTTCAAAGAACAGCATGGATTTTTCTGTGAAT
CGTGAGCGTTTTCGCAATGCTTAACACGGCAGCTGGTAATGATGATTGCT
CCTGTTTCCCTTTGAATTTCGTGTTCGTTTACTTAACAGGGCATTGCTAA
TCTAGAAGAAGGGAGTGGGTGAAGAATCCCATTTGTAAAGAGGATAGCAG
GTTAATGAAAAGAAGCAGAGGTATGCGTAGGTGATAGTGTTTCTACAAGG
CTCGGTTCAATTGGTATGATTTAAAGGCAAGCCTTGGCTGGCTGGTCATA
ATAAGGGCCACATAATGGAGGGGATTTACGTGGCAATTACCATGGTCCTT
GCTAGTGGGATACAATGTTTTAGGGCTCCCTGGATACTTAAGATTAATGT
CTGAATCAGT
Enhancer C:
chr8:128303931-128304850
TCAGAGAGGACTGTCCTGTAACCAGAAAGAGGATGTGTTAGGATCTGAAC
CCATCTGACGAAAGGCTATGCTCTTAATTAGTAACATTTCCCTGCCTTGC
AAGGACACATGTAGGTCACAGGATACCCAGGGAAGGTAAATGCTCTGTCC
TTTTCTCACCAGTACTACAACTTAGTAACAGCCTCTGGCCCAAAATGAGA
CTGGACATTGACTTTAATGGATGGAAGTACACATTCCTAACATGGATTCA
TTCAGAAGCACCCAGATTTCACAAGAGGAAATGATGAGGCATTTTTCTGA
GGTGTTGAAATTGTGCCCTTTGTCAGTCACAAACCAACCAAAAAAAAAAA
AAAAGGCTTTGAAAATTCCTCAAAGGTAAAAGGTAGCCTTTCTTCTCTCA
TAGTTCTGATATAGTCCCAAAAGGAAACAAAAGCTTGCATAATTCTAGCC
CCAGTGATTCTTCTTTCCTTCTTATTAACTACAAATCTTCACCACATTTT
TTCTTACTAATTAGTCACATGCTTAAGCTCCTGAGTCACGGAGTTGTCTA
CTGGTTATAGCTTGTTCTAGCTCTTCCACCCTCAAATGGAACTTGCAAGG
AATTAGGCCCTCTGAAGATCGCACATTCAAGTCATGAAAACAAGCCAACA
ATGAAATCAATCACTGCCGAGAAGGGTGGACAAGCACAAGCATTAAGACC
CACTACTGTTGAGTCAGGGCCTTCAGATATGCTGCCAATGGGAAGAAGAG
AGAAAAATTATGTTTATTCATTTATAAATATGTGCATTCTTGCCTCCAAA
GGTCCCAATTTCACACTGGTCCAGTTGGGTTCTCTTTCCTTTGCTGCATT
CAGGAGCACAGTTGTATTTCATCTACTGCTTGAGAATGCAGTGGAGCTTG
TCGCCAGCAGTGATGGAGCC
Enhancer D:
chr8:128328631-128329290
TTGGATTCAAGGTCCTGGAATGAGTGAGTTGGAAAGATGGAGTGTGGTGG
TTAATAAAGTGAAATACTTGAAACCGAGATTACAGGGAGTGGCAGTGATT
TTAATGCCAAGACCTAAAAAGAAGAGAGAAGAGGTAAGAGAGTTAAGGTC
AAGTTACTGGAAAGATTATCTTGACTGCTAGTGAAGTCACCAGTTTATGA
TATGAACAGTATGATTATGATTATGAGAACAGGTCAGGAGTTAAAAACTT
CAAAGAATAAGGGGGAATTCTCTGAATCATGGGTTTGTAGATGCCTGCAA
TAAACAGGGGCAACTGAAGGTATAGATGGATGACATAAACTTCAAAGCGA
GTTTTCAGAGAGCAGGCAGGGAGAAGCATCTGGAGGCTGGAATGAGGAAA
TAAGAGGACACCTAGTCAACCTCCAGGCTAGTGATAGAAAGAAGCAGAAG
AAAAAAAAAGTGACAAATTAGAAGGACTTTATGAGGAGGCAGGGATCCCA
GGAGTATCTGAGTTTCCATTAGAGCAAAAAGGCAAAAAGGGATTTATAAA
GAAGTGGCACAGGTTATAAGGGATTTTGCTGATGACTGATCTGGAATTGT
ACAAGGGAGGGTGAGGGAATTAGAAAGAGGTGAAGATGGGGTCAGATTAG
GTGGTATACA
Enhancer E:
chr8:128347011-128347610
ACCCAAACTATTGAATACTTTTGGGTGAATCATTCCCAATCTGAACTGAT
AATCCTTGCCGAAACCTTTTCTTTCCAGACCATAAAAACACAGCAGCTTG
TTAATCATACAACTATTTAACCCAGTCCCTCCCTAGTCCTACAAATGAGC
TCCAAGCCCATAACGTATAATCTACCCACCCACACATATTGAAATGAGAT
TATTGTTCCCACAGAAAAGAGCCCTGCAGTTGCACAAGTCCCAACTTTGC
TCCCGAGGGCGATAAAAGGGACAAGGAAAAGGCATGGAGTTGTTTGATAG
GCTTCTAAGGAAGGCTCAGAAAGGATGAAAGATTACCCTCCCAGGTACAC
AGTGTGGAGCAGCGTTCCAGCAAACATCCAGAGGGTTCCCACACTCCACC
CAGGCACGCTCCCGAACTCTTTGATCTAGAAACCACCACGAATTACTGAT
CGTTACAGAGGTGGCCGGAGTGGATGAACCTATCTTTTCTTATAAAGTAA
GAGCTTCCAGGGAGGAAAAATACCCTCAAAAAGAACATTGTGGCAGGTGA
GAATCCAGGCTGAGGAGCAGCTTGCCACAGCAGAAAAAGAAGAGTTTTGG
